# Supplementary material
Source: PubMed Central journal article supplement (PMC2882218)
Supplement: WNL.0b013e3181e0f7e6_1.pdf [file WNL.0b013e3181e0f7e6_1.pdf]

Figure e-1A Adjusted GEE results: Cardiotoxicity (n=128)

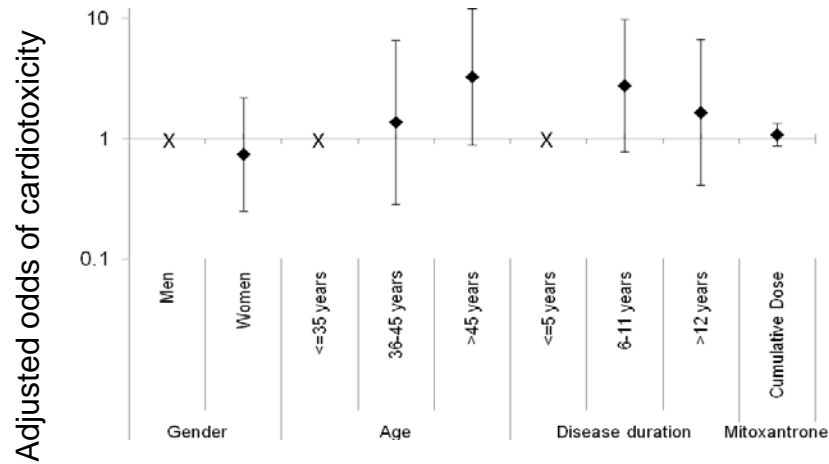

Figure e-1C Adjusted GEE results: Anemia (women only; n=80)

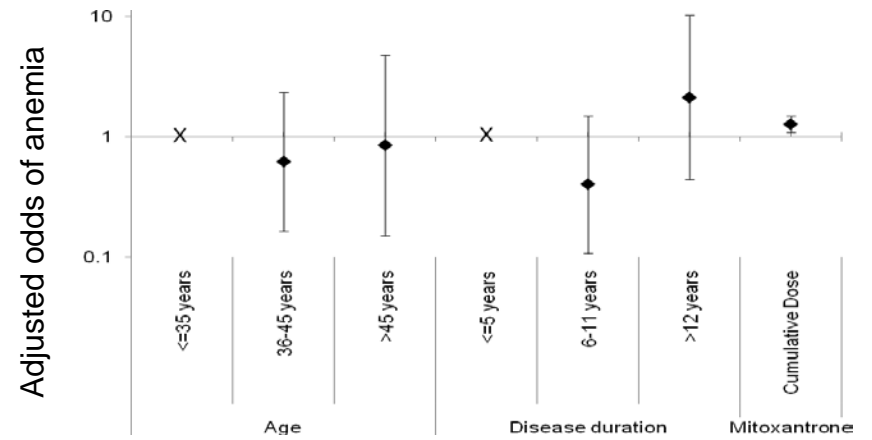

Figure e-1B Adjusted GEE results: Neutropenia (n=146)

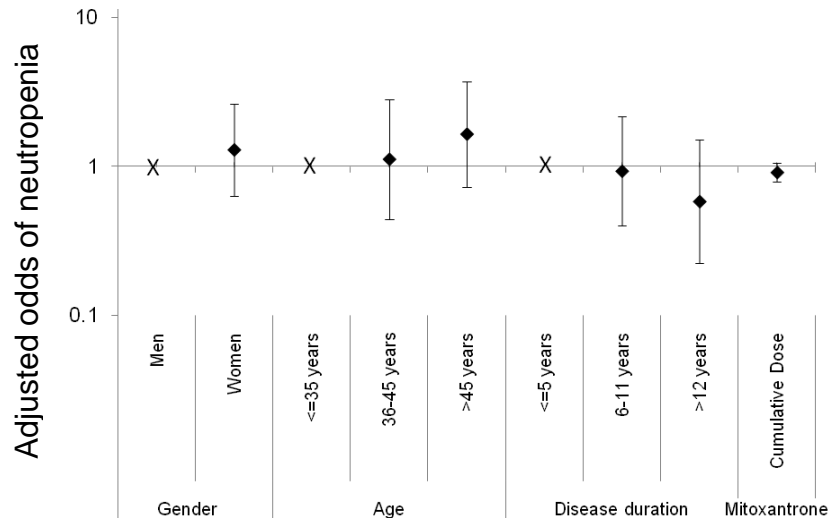

Figure e-1D Adjusted GEE results: Liver toxicity (n=134)

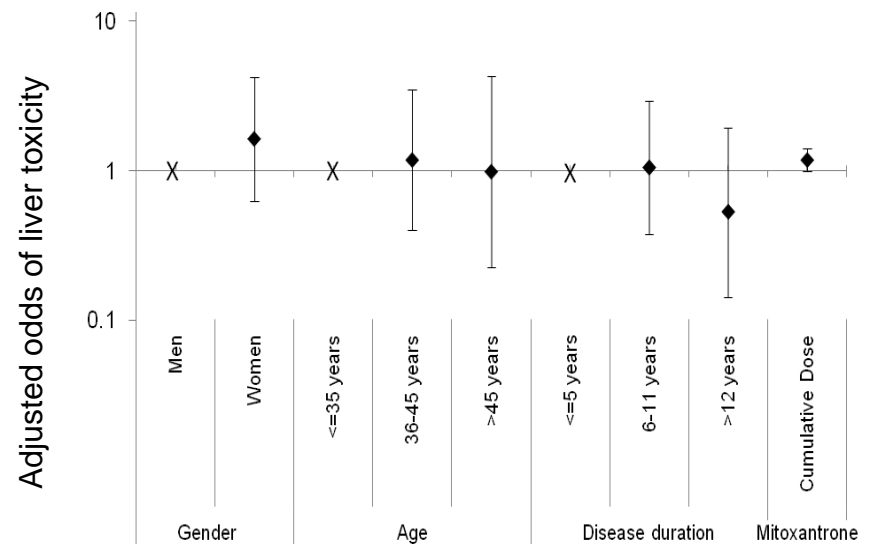

Figure e-1

Risk factors associated with *de novo* (A) cardiotoxicity; (B) neutropenia; (C) anemia and (D) liver toxicity. All generalized estimating equation models were adjusted for ethnicity and BMI as well as the variables shown on each of the graphs. The adjusted OR for cumulative dose represents an increase of  $10\text{mg}/\text{m}^2$  of mitoxantrone. Age and disease duration were as measured at first mitoxantrone treatment. X represents the reference category for the categorical variables. Odds ratios are plotted on a logarithmic scale and error bars represent 95% confidence intervals.
